# Supplementary material for: Genome Plasticity in Cultured Leishmania donovani: Comparison of Early and Late Passages
Source: Front Microbiol. 2018 Jul 3;9:1279. doi: 10.3389/fmicb.2018.01279 (PMC6037818; doi:10.3389/fmicb.2018.01279)
Supplement: Supplementary file 3 [file Data_Sheet_1.xlsx]

## Sheet: HTI4_HTI5
Data Sheet S1. Gene Ontology of Early and Late passage L. donovani AG83 genomes.
term_ID	description	HTI4 Frequency		description	HTI5 frequency
GO:0006184	(obsolete) GTP catabolic process	0.00613		(obsolete) GTP catabolic process	0.00613
GO:0006979	response to oxidative stress	0.00034		response to oxidative stress	0.00034
GO:0006952	defense response	0.00056
GO:0007155	cell adhesion	0.06435		cell adhesion	0.06435
GO:0008152	metabolic process	0.10324		metabolic process	0.10324
GO:0008612	peptidyl-lysine modification to peptidyl-hypusine	0.00017		peptidyl-lysine modification to peptidyl-hypusine	0.00017
GO:0000413	protein peptidyl-prolyl isomerization	0.00034		protein peptidyl-prolyl isomerization	0.00034
GO:0071929	alpha-tubulin acetylation	8e-05		alpha-tubulin acetylation	8e-05
GO:0009405	pathogenesis	0.81502		pathogenesis	0.81502
GO:0009877	nodulation	0.75		nodulation	0.75
GO:0043044	ATP-dependent chromatin remodeling	8e-05		ATP-dependent chromatin remodeling	8e-05
GO:0030833	regulation of actin filament polymerization	8e-05		regulation of actin filament polymerization	8e-05
GO:0051205	protein insertion into membrane	0.0005		protein insertion into membrane	0.0005
GO:0006265	DNA topological change	0.00017		DNA topological change	0.00017
GO:0051260	protein homooligomerization	0.00067		protein homooligomerization	0.00067
GO:0051276	chromosome organization	0.00042		chromosome organization	0.00042
GO:0034314	Arp2/3 complex-mediated actin nucleation	8e-05		Arp2/3 complex-mediated actin nucleation	8e-05
GO:0006338	chromatin remodeling	8e-05		chromatin remodeling	8e-05
GO:0006333	chromatin assembly or disassembly	0.00034		chromatin assembly or disassembly	0.00034
GO:0006334	nucleosome assembly	0.00034		nucleosome assembly	0.00034
GO:0042073	intraciliary transport	0.00017		intraciliary transport	0.00017
GO:0045893	positive regulation of transcription, DNA-templated	0.00029		positive regulation of transcription, DNA-templated	0.00029
GO:0000902	cell morphogenesis	0.00176		cell morphogenesis	0.00176
GO:0034453	microtubule anchoring	8e-05		microtubule anchoring	8e-05
GO:0016226	iron-sulfur cluster assembly	0.0105		iron-sulfur cluster assembly	0.0105
GO:0043461	proton-transporting ATP synthase complex assembly	0.00034		proton-transporting ATP synthase complex assembly	0.00034
GO:0016559	peroxisome fission	8e-05		peroxisome fission	8e-05
GO:0000045	autophagosome assembly	0.00067		autophagosome assembly	0.00067
GO:0008284	positive regulation of cell proliferation	0.00017
GO:0042256	mature ribosome assembly	0.00042		mature ribosome assembly	0.00042
GO:0042254	ribosome biogenesis	0.00042		ribosome biogenesis	0.00042
GO:0007067	mitotic nuclear division	0.00152		mitotic nuclear division	0.00152
GO:0007076	mitotic chromosome condensation	0.00152		mitotic chromosome condensation	0.00152
GO:0016570	histone modification	8e-05		histone modification	8e-05
GO:0007031	peroxisome organization	0.00021		peroxisome organization	0.00021
GO:0048870	cell motility	0.00017		cell motility	0.00017
GO:0006614	SRP-dependent cotranslational protein targeting to membrane	0.00034		SRP-dependent cotranslational protein targeting to membrane	0.00034
GO:0007021	tubulin complex assembly	0.00017		tubulin complex assembly	0.00017
GO:0007018	microtubule-based movement	0.00017		microtubule-based movement	0.00017
GO:0006415	translational termination	8e-05		translational termination	8e-05
GO:0007010	cytoskeleton organization	0.00021		cytoskeleton organization	0.00021
GO:0042384	cilium assembly	0.00042		cilium assembly	0.00042
GO:0006461	protein complex assembly	0.00067		protein complex assembly	0.00067
GO:0000723	telomere maintenance	0.00582		telomere maintenance	0.00582
GO:0030041	actin filament polymerization	0.00017		actin filament polymerization	0.00017
GO:0000226	microtubule cytoskeleton organization	0.00011		microtubule cytoskeleton organization	0.00011
GO:0000910	cytokinesis	8e-05		cytokinesis	8e-05
GO:0000079	regulation of cyclin-dependent protein serine/threonine kinase activity	0.00025		regulation of cyclin-dependent protein serine/threonine kinase activity	0.00025
GO:0045454	cell redox homeostasis	0.00109		cell redox homeostasis	0.00109
GO:0006302	double-strand break repair	0.00019		double-strand break repair	0.00019
GO:0006303	double-strand break repair via nonhomologous end joining	0.00017		double-strand break repair via nonhomologous end joining	0.00017
GO:0006298	mismatch repair	0.00025		mismatch repair	0.00025
GO:0006289	nucleotide-excision repair	0.00025		nucleotide-excision repair	0.00025
GO:0006284	base-excision repair	0.00017		base-excision repair	0.00017
GO:0006281	DNA repair	0.00101		DNA repair	0.00101
GO:0035556	intracellular signal transduction	0.0026		intracellular signal transduction	0.0026
GO:0006855	drug transmembrane transport	0.00836		drug transmembrane transport	0.00836
GO:0007264	small GTPase mediated signal transduction	0.00176		small GTPase mediated signal transduction	0.00176
GO:0007205	protein kinase C-activating G-protein coupled receptor signaling pathway	0.00286		protein kinase C-activating G-protein coupled receptor signaling pathway	0.00286
GO:0007165	signal transduction	0.00286		signal transduction	0.00286
GO:0032012	regulation of ARF protein signal transduction	0.00147		regulation of ARF protein signal transduction	0.00147
GO:1901031	regulation of response to reactive oxygen species	0.00025		regulation of response to reactive oxygen species	0.00025
GO:0045765	regulation of angiogenesis	0.0058		regulation of angiogenesis	0.0058
GO:0009966	regulation of signal transduction	0.00147		regulation of signal transduction	0.00147
GO:0006950	response to stress	0.00244		response to stress	0.00244
GO:0000724	double-strand break repair via homologous recombination	0.00017		double-strand break repair via homologous recombination	0.00017
GO:0009432	SOS response	0.00063		SOS response	0.00063
GO:0032259	methylation	0.00697		methylation	0.00697
GO:0007049	cell cycle	0.00034		cell cycle	0.00034
GO:0006801	superoxide metabolic process	0.00025		superoxide metabolic process	0.00025
GO:0007017	microtubule-based process	0.00042		microtubule-based process	0.00042
GO:0006576	cellular biogenic amine metabolic process	0.00042		cellular biogenic amine metabolic process	0.00042
GO:0019441	tryptophan catabolic process to kynurenine	8e-05		tryptophan catabolic process to kynurenine	8e-05
GO:0006546	glycine catabolic process	0.01025		glycine catabolic process	0.01025
GO:0019551	glutamate catabolic process to 2-oxoglutarate	8e-05		glutamate catabolic process to 2-oxoglutarate	8e-05
GO:0008295	spermidine biosynthetic process	0.00017		spermidine biosynthetic process	0.00017
GO:0006597	spermine biosynthetic process	0.00017		spermine biosynthetic process	0.00017
GO:0006635	fatty acid beta-oxidation	8e-05		fatty acid beta-oxidation	8e-05
GO:0019478	D-amino acid catabolic process	8e-05		D-amino acid catabolic process	8e-05
GO:0005975	carbohydrate metabolic process	0.00235		carbohydrate metabolic process	0.00235
GO:0006526	arginine biosynthetic process	8e-05		arginine biosynthetic process	8e-05
GO:0006542	glutamine biosynthetic process	8e-05		glutamine biosynthetic process	8e-05
GO:0006541	glutamine metabolic process	0.00017		glutamine metabolic process	0.00017
GO:0006222	UMP biosynthetic process	0.00017		UMP biosynthetic process	0.00017
GO:0008033	tRNA processing	0.00017		tRNA processing	0.00017
GO:0006370	7-methylguanosine mRNA capping	0.00025		7-methylguanosine mRNA capping	0.00025
GO:0006364	rRNA processing	8e-05		rRNA processing	8e-05
GO:0006388	tRNA splicing, via endonucleolytic cleavage and ligation	8e-05		tRNA splicing, via endonucleolytic cleavage and ligation	8e-05
GO:0006378	mRNA polyadenylation	0.00025		mRNA polyadenylation	0.00025
GO:0001522	pseudouridine synthesis	8e-05		pseudouridine synthesis	8e-05
GO:0000398	mRNA splicing, via spliceosome	0.00025		mRNA splicing, via spliceosome	0.00025
GO:0008616	queuosine biosynthetic process	8e-05		queuosine biosynthetic process	8e-05
GO:0043039	tRNA aminoacylation	0.00025		tRNA aminoacylation	0.00025
GO:0030488	tRNA methylation	8e-05		tRNA methylation	8e-05
GO:0006418	tRNA aminoacylation for protein translation	0.00025		tRNA aminoacylation for protein translation	0.00025
GO:0006419	alanyl-tRNA aminoacylation	0.00013		alanyl-tRNA aminoacylation	0.00013
GO:0006420	arginyl-tRNA aminoacylation	0.00013		arginyl-tRNA aminoacylation	0.00013
GO:0031167	rRNA methylation	8e-05		rRNA methylation	8e-05
GO:0008380	RNA splicing	0.00017		RNA splicing	0.00017
GO:0006397	mRNA processing	0.00017		mRNA processing	0.00017
GO:0006400	tRNA modification	8e-05		tRNA modification	8e-05
GO:0006438	valyl-tRNA aminoacylation	0.00017		valyl-tRNA aminoacylation	0.00017
GO:0006432	phenylalanyl-tRNA aminoacylation	0.00013		phenylalanyl-tRNA aminoacylation	0.00013
GO:0009972	cytidine deamination	0.00025		cytidine deamination	0.00025
GO:0034227	tRNA thio-modification	8e-05		tRNA thio-modification	8e-05
GO:0006563	L-serine metabolic process	8e-05		L-serine metabolic process	8e-05
GO:0055085	transmembrane transport	0.04259		transmembrane transport	0.04259
GO:0015992	proton transport	0.00882		proton transport	0.00882
GO:0006796	phosphate-containing compound metabolic process	0.04772		phosphate-containing compound metabolic process	0.04772
GO:0006810	transport	0.04671		transport	0.04671
GO:0006811	ion transport	0.01714		ion transport	0.01714
GO:0006812	cation transport	0.01689		cation transport	0.01689
GO:0006807	nitrogen compound metabolic process	0.05444		nitrogen compound metabolic process	0.05444
GO:0044237	cellular metabolic process	0.07132		cellular metabolic process	0.07132
GO:0055114	oxidation-reduction process	0.02377		oxidation-reduction process	0.02377
GO:0071704	organic substance metabolic process	0.08249		organic substance metabolic process	0.08249
GO:0006139	nucleobase-containing compound metabolic process	0.04688		nucleobase-containing compound metabolic process	0.04688
GO:0009116	nucleoside metabolic process	0.03108		nucleoside metabolic process	0.03108
GO:0046034	ATP metabolic process	0.02352		ATP metabolic process	0.02352
GO:0046168	glycerol-3-phosphate catabolic process	0.02705		glycerol-3-phosphate catabolic process	0.02705
GO:0051156	glucose 6-phosphate metabolic process	0.01265		glucose 6-phosphate metabolic process	0.01265
GO:0034220	ion transmembrane transport	0.01647		ion transmembrane transport	0.01647
GO:0006310	DNA recombination	0.00017		DNA recombination	0.00017
GO:0009058	biosynthetic process	0.0226		biosynthetic process	0.0226
GO:0006629	lipid metabolic process	0.00193		lipid metabolic process	0.00193
GO:0009231	riboflavin biosynthetic process	0.00017		riboflavin biosynthetic process	0.00017
GO:0033014	tetrapyrrole biosynthetic process	0.00084		tetrapyrrole biosynthetic process	0.00084
GO:0015995	chlorophyll biosynthetic process	0.00468		chlorophyll biosynthetic process	0.00468
GO:0006783	heme biosynthetic process	0.00025		heme biosynthetic process	0.00025
GO:0006784	heme a biosynthetic process	8e-05		heme a biosynthetic process	8e-05
GO:0006779	porphyrin-containing compound biosynthetic process	0.00059		porphyrin-containing compound biosynthetic process	0.00059
GO:0016117	carotenoid biosynthetic process	0.00247		carotenoid biosynthetic process	0.00247
GO:0006825	copper ion transport	0.00017		copper ion transport	0.00017
GO:0006813	potassium ion transport	0.00311		potassium ion transport	0.00311
GO:0006814	sodium ion transport	0.00311		sodium ion transport	0.00311
GO:0015684	ferrous iron transport	0.00034		ferrous iron transport	0.00034
GO:0042558	pteridine-containing compound metabolic process	0.00487		pteridine-containing compound metabolic process	0.00487
GO:0015991	ATP hydrolysis coupled proton transport	0.00034		ATP hydrolysis coupled proton transport	0.00034
GO:0006750	glutathione biosynthetic process	0.0005		glutathione biosynthetic process	0.0005
GO:0009086	methionine biosynthetic process	0.00109		methionine biosynthetic process	0.00109
GO:0009229	thiamine diphosphate biosynthetic process	8e-05		thiamine diphosphate biosynthetic process	8e-05
GO:0006529	asparagine biosynthetic process	0.00109		asparagine biosynthetic process	0.00109
GO:0006555	methionine metabolic process	0.00084		methionine metabolic process	0.00084
GO:0009396	folic acid-containing compound biosynthetic process	0.00168		folic acid-containing compound biosynthetic process	0.00168
GO:0006465	signal peptide processing	0.00017		signal peptide processing	0.00017
GO:0016310	phosphorylation	0.00622		phosphorylation	0.00622
GO:0006207	'de novo' pyrimidine nucleobase biosynthetic process	0.00025		'de novo' pyrimidine nucleobase biosynthetic process	0.00025
GO:0031388	organic acid phosphorylation	0.0042		organic acid phosphorylation	0.0042
GO:0006165	nucleoside diphosphate phosphorylation	0.00281		nucleoside diphosphate phosphorylation	0.00281
GO:0009186	deoxyribonucleoside diphosphate metabolic process	0.00017		deoxyribonucleoside diphosphate metabolic process	0.00017
GO:0006122	mitochondrial electron transport, ubiquinol to cytochrome c	0.00168		mitochondrial electron transport, ubiquinol to cytochrome c	0.00168
GO:0030001	metal ion transport	0.0005		metal ion transport	0.0005
GO:0006164	purine nucleotide biosynthetic process	0.00101		purine nucleotide biosynthetic process	0.00101
GO:0006177	GMP biosynthetic process	0.00017		GMP biosynthetic process	0.00017
GO:0006183	GTP biosynthetic process	0.00038		GTP biosynthetic process	0.00038
GO:0006188	IMP biosynthetic process	0.00067		IMP biosynthetic process	0.00067
GO:0015937	coenzyme A biosynthetic process	0.00051		coenzyme A biosynthetic process	0.00051
GO:0006241	CTP biosynthetic process	8e-05		CTP biosynthetic process	8e-05
GO:0015986	ATP synthesis coupled proton transport	8e-05		ATP synthesis coupled proton transport	8e-05
GO:0006228	UTP biosynthetic process	0.00013		UTP biosynthetic process	0.00013
GO:0009451	RNA modification	8e-05		RNA modification	8e-05
GO:0009190	cyclic nucleotide biosynthetic process	0.00042		cyclic nucleotide biosynthetic process	0.00042
GO:0006730	one-carbon metabolic process	0.00588		one-carbon metabolic process	0.00588
GO:0009059	macromolecule biosynthetic process	0.0042		macromolecule biosynthetic process	0.0042
GO:0019538	protein metabolic process	0.02503		protein metabolic process	0.02503
GO:0006508	proteolysis	0.01798		proteolysis	0.01798
GO:0015979	photosynthesis	0.01396		photosynthesis	0.01396
GO:0016192	vesicle-mediated transport	0.0016		vesicle-mediated transport	0.0016
GO:0050708	regulation of protein secretion	8e-05		regulation of protein secretion	8e-05
GO:0006893	Golgi to plasma membrane transport	0.00019		Golgi to plasma membrane transport	0.00019
GO:0006888	ER to Golgi vesicle-mediated transport	8e-05		ER to Golgi vesicle-mediated transport	8e-05
GO:0006887	exocytosis	0.00034		exocytosis	0.00034
GO:0006890	retrograde vesicle-mediated transport, Golgi to ER	0.00017		retrograde vesicle-mediated transport, Golgi to ER	0.00017
GO:0006891	intra-Golgi vesicle-mediated transport	0.00013		intra-Golgi vesicle-mediated transport	0.00013
GO:0042147	retrograde transport, endosome to Golgi	0.00034		retrograde transport, endosome to Golgi	0.00034
GO:0048278	vesicle docking	0.00034		vesicle docking	0.00034
GO:0000042	protein targeting to Golgi	0.0002		protein targeting to Golgi	0.0002
GO:0006605	protein targeting	0.00059		protein targeting	0.00059
GO:0032065	cortical protein anchoring	8e-05		cortical protein anchoring	8e-05
GO:0006621	protein retention in ER lumen	8e-05		protein retention in ER lumen	8e-05
GO:0007034	vacuolar transport	0.00029		vacuolar transport	0.00029
GO:0006909	phagocytosis	0.00784		phagocytosis	0.00784
GO:0006904	vesicle docking involved in exocytosis	0.00034		vesicle docking involved in exocytosis	0.00034
GO:0009103	lipopolysaccharide biosynthetic process	0.00175		lipopolysaccharide biosynthetic process	0.00175
GO:0006777	Mo-molybdopterin cofactor biosynthetic process	0.00245		Mo-molybdopterin cofactor biosynthetic process	0.00245
GO:0006269	DNA replication, synthesis of RNA primer	0.00063		DNA replication, synthesis of RNA primer	0.00063
GO:0006270	DNA replication initiation	0.00034		DNA replication initiation	0.00034
GO:0006275	regulation of DNA replication	8e-05		regulation of DNA replication	8e-05
GO:0019307	mannose biosynthetic process	0.00025		mannose biosynthetic process	0.00025
GO:0016042	lipid catabolic process	8e-05		lipid catabolic process	8e-05
GO:0019752	carboxylic acid metabolic process	0.0152		carboxylic acid metabolic process	0.0152
GO:0006383	transcription from RNA polymerase III promoter	0.00034		transcription from RNA polymerase III promoter	0.00034
GO:0006355	regulation of transcription, DNA-templated	0.0005		regulation of transcription, DNA-templated	0.0005
GO:0006352	DNA-templated transcription, initiation	0.00017		DNA-templated transcription, initiation	0.00017
GO:0006351	transcription, DNA-templated	0.00134		transcription, DNA-templated	0.00134
GO:0044262	cellular carbohydrate metabolic process	0.00076		cellular carbohydrate metabolic process	0.00076
GO:0006659	phosphatidylserine biosynthetic process	0.0019		phosphatidylserine biosynthetic process	0.0019
GO:0016125	sterol metabolic process	0.00191		sterol metabolic process	0.00191
GO:0043631	RNA polyadenylation	0.0004		RNA polyadenylation	0.0004
GO:0030259	lipid glycosylation	0.00151		lipid glycosylation	0.00151
GO:0018342	protein prenylation	0.00059		protein prenylation	0.00059
GO:0046488	phosphatidylinositol metabolic process	0.00025		phosphatidylinositol metabolic process	0.00025
GO:0008654	phospholipid biosynthetic process	0.00067		phospholipid biosynthetic process	0.00067
GO:0006694	steroid biosynthetic process	0.00191		steroid biosynthetic process	0.00191
GO:0008652	cellular amino acid biosynthetic process	0.01243		cellular amino acid biosynthetic process	0.01243
GO:0008610	lipid biosynthetic process	0.00176		lipid biosynthetic process	0.00176
GO:0015936	coenzyme A metabolic process	0.00549		coenzyme A metabolic process	0.00549
GO:0006231	dTMP biosynthetic process	0.0068		dTMP biosynthetic process	0.0068
GO:0009159	deoxyribonucleoside monophosphate catabolic process	0.01386		deoxyribonucleoside monophosphate catabolic process	0.01386
GO:0006729	tetrahydrobiopterin biosynthetic process	8e-05		tetrahydrobiopterin biosynthetic process	8e-05
GO:0006259	DNA metabolic process	0.00294		DNA metabolic process	0.00294
GO:0006260	DNA replication	0.00101		DNA replication	0.00101
GO:0009165	nucleotide biosynthetic process	0.01218		nucleotide biosynthetic process	0.01218
GO:0006741	NADP biosynthetic process	0.00017		NADP biosynthetic process	0.00017
GO:0006744	ubiquinone biosynthetic process	0.00017		ubiquinone biosynthetic process	0.00017
GO:0046854	phosphatidylinositol phosphorylation	0.00025		phosphatidylinositol phosphorylation	0.00025
GO:0006221	pyrimidine nucleotide biosynthetic process	0.00722		pyrimidine nucleotide biosynthetic process	0.00722
GO:0006545	glycine biosynthetic process	0.01025		glycine biosynthetic process	0.01025
GO:0006544	glycine metabolic process	0.01033		glycine metabolic process	0.01033
GO:0006520	cellular amino acid metabolic process	0.01336		cellular amino acid metabolic process	0.01336
GO:0008299	isoprenoid biosynthetic process	0.00076		isoprenoid biosynthetic process	0.00076
GO:0006021	inositol biosynthetic process	8e-05		inositol biosynthetic process	8e-05
GO:0006006	glucose metabolic process	0.00067		glucose metabolic process	0.00067
GO:0006007	glucose catabolic process	0.00017		glucose catabolic process	0.0002
GO:0000077	DNA damage checkpoint	0.00101		DNA damage checkpoint	0.00101
GO:0016567	protein ubiquitination	0.00462		protein ubiquitination	0.00462
GO:0006098	pentose-phosphate shunt	0.00017		pentose-phosphate shunt	0.00017
GO:0006094	gluconeogenesis	0.00025		gluconeogenesis	0.00025
GO:0006096	glycolytic process	0.00126		glycolytic process	0.00126
GO:0006631	fatty acid metabolic process	0.00042		fatty acid metabolic process	0.00042
GO:0006633	fatty acid biosynthetic process	0.00034		fatty acid biosynthetic process	0.00034
GO:0009311	oligosaccharide metabolic process	0.00078		oligosaccharide metabolic process	0.00078
GO:0009312	oligosaccharide biosynthetic process	0.00025		oligosaccharide biosynthetic process	0.00025
GO:0006071	glycerol metabolic process	8e-05		glycerol metabolic process	8e-05
GO:0006412	translation	0.00151		translation	0.00151
GO:0006413	translational initiation	0.00034		translational initiation	0.00034
GO:0006414	translational elongation	0.00084		translational elongation	0.00084
GO:0006396	RNA processing	0.00025		RNA processing	0.00025
GO:0010826	negative regulation of centrosome duplication	8e-05		negative regulation of centrosome duplication	8e-05
GO:0006470	protein dephosphorylation	0.00059		protein dephosphorylation	0.00059
GO:0006479	protein methylation	0.00462		protein methylation	0.00462
GO:0006480	N-terminal protein amino acid methylation	8e-05		N-terminal protein amino acid methylation	8e-05
GO:0006481	C-terminal protein methylation	8e-05		C-terminal protein methylation	8e-05
GO:0006000	fructose metabolic process	0.00036		fructose metabolic process	0.00036
GO:0006457	protein folding	0.00126		protein folding	0.00126
GO:0006464	cellular protein modification process	0.00462		cellular protein modification process	0.00462
GO:0006468	protein phosphorylation	0.00235		protein phosphorylation	0.00235
GO:0006506	GPI anchor biosynthetic process	0.00025		GPI anchor biosynthetic process	0.00025
GO:0006486	protein glycosylation	0.0037		protein glycosylation	0.0037
GO:0016480	negative regulation of transcription from RNA polymerase III promoter	8e-05		negative regulation of transcription from RNA polymerase III promoter	8e-05
GO:0003333	amino acid transmembrane transport	0.00025		amino acid transmembrane transport	0.00025
GO:0015031	protein transport	0.0026		protein transport	0.0026
GO:0006817	phosphate ion transport	8e-05		phosphate ion transport	8e-05
GO:0006821	chloride transport	8e-05		chloride transport	8e-05
GO:0006850	mitochondrial pyruvate transport	0.00017		mitochondrial pyruvate transport	0.00017
GO:0006869	lipid transport	0.00034		lipid transport	0.00034
GO:0006886	intracellular protein transport	0.00118		intracellular protein transport	0.00118
GO:0046907	intracellular transport	0.00143		intracellular transport	0.00143
GO:0008272	sulfate transport	8e-05		sulfate transport	8e-05
GO:0006626	protein targeting to mitochondrion	0.00017		protein targeting to mitochondrion	0.00017
GO:0006406	mRNA export from nucleus	0.00086		mRNA export from nucleus	0.00086
GO:0015689	molybdate ion transport	8e-05		molybdate ion transport	8e-05
GO:0008643	carbohydrate transport	8e-05		carbohydrate transport	8e-05
GO:0042176	regulation of protein catabolic process	0.00027		regulation of protein catabolic process	0.00027
GO:0006308	DNA catabolic process	0.00017		DNA catabolic process	0.00017
GO:0043161	proteasome-mediated ubiquitin-dependent protein catabolic process	0.00025		proteasome-mediated ubiquitin-dependent protein catabolic process	0.00025
GO:0043666	regulation of phosphoprotein phosphatase activity	8e-05		regulation of phosphoprotein phosphatase activity	8e-05
GO:0043087	regulation of GTPase activity	8e-05		regulation of GTPase activity	8e-05
GO:0051603	proteolysis involved in cellular protein catabolic process	0.00034		proteolysis involved in cellular protein catabolic process	0.00034
GO:0006511	ubiquitin-dependent protein catabolic process	0.00025		ubiquitin-dependent protein catabolic process	0.00025
