# Supplementary material for: Genome Plasticity in Cultured Leishmania donovani: Comparison of Early and Late Passages
Source: Front Microbiol. 2018 Jul 3;9:1279. doi: 10.3389/fmicb.2018.01279 (PMC6037818; doi:10.3389/fmicb.2018.01279)
Supplement: Supplementary file 6 [file Data_Sheet_4.xlsx]

## Sheet: diffExpGenes
		Data Sheet S4. Differential expression analysis of L. donovani AG83 passages.
	gene_id	Is SignalP?	annotation	Location	sample_id	sample_id		FPKM	FPKM	log fold change	test_stat	p value	q value	significance
					q1: Early passage
					q2: Middle passage
					q3: Late passage
LdBPK_101070.1.1	XLOC_000069	Non secretory protein	Histone-like transcription factor (CBF/NF-Y) and archaeal histone	iicb_chr10:437186-442425	q1	q2	OK	465.355	214.511	-1.11728	-4.68157	5e-05	0.0145481	yes
No match	XLOC_000309	Marked as non-coding	conserved hypothetical protein	iicb_chr15:317103-319298	q1	q2	OK	12.4276	1.3866	-3.16392	-5.25818	5e-05	0.0145481	yes
LdBPK_101070.1.1	XLOC_000069	Non secretory protein	Histone-like transcription factor (CBF/NF-Y) and archaeal histone	iicb_chr10:437186-442425	q1	q3	OK	465.355	235.576	-0.982138	-4.11407	0.00015	0.0354609	yes
LDON_100018400.1	XLOC_000079	Non secretory protein	No ortholog to public L donovani. Partial matches to the gene id LDON_100018400.1. Conserved hypothetical protein	iicb_chr10:541679-543333	q1	q2	OK	66.4635	148.847	1.16319	4.11028	5e-05	0.0145481	yes
No match	XLOC_000263	Non secretory protein	In the noncoding region	iicb_chr14:353770-355381	q2	q3	OK	294.359	653.566	1.15076	4.63283	5e-05	0.0145481	yes
LdBPK_150020.1.1; LdBPK_150030.1.1;LdBPK_150040.1.1	XLOC_000281	3 genes are residing in this region: LDON_150005000; LDON_150005100;LDON_150005200 and one pseudogene. Annotations:Hypothetical; ATP diphosphohydrolase; GDA1/CD39 (nucleoside phosphatase)	farnesyltransferase beta subunit partial mRNA	iicb_chr15:803-12528	q1	q2	OK	108.43	54.1077	-1.00285	-3.89401	0.0001	0.0252167	yes
LDON_190013400.1; LdBPK_190970.1.1	XLOC_000544	Non secretory protein	2 genes are there in this region: DFYVE zinc finger containing protein and D4-coumarate:coa ligase-like protein	iicb_chr19:382620-399010	q2	q3	OK	270.819	109.889	-1.30128	-4.18151	5e-05	0.0145481	yes
LdBPK_020520.1.1;LdBPK_020530.1.1;	XLOC_000574	Signal peptide	several genes are present in this block; conserved hypothetical protein;	iicb_chr2:244438-249361	q2	q3	OK	51.238	106.08	1.04986	4.11042	5e-05	0.0145481	yes
LdBPK_040430.1.1;	XLOC_000608	Non secretory protein	Calpain-like cysteine protease	iicb_chr20:537354-542421	q2	q3	OK	162.941	309.344	0.924864	3.78585	5e-05	0.0145481	yes
LdBPK_221160.1.1	XLOC_000743	Non secretory protein	ribonucleoside-diphosphate reductase small chain, putative	iicb_chr22:518255-522535	q1	q2	OK	18.3359	6.52561	-1.49048	-4.11368	0.0002	0.0432286	yes
LdBPK_261550.1.1	XLOC_000952	Signal peptide	metallopeptidase	iicb_chr26:570833-573843	q1	q2	OK	72.9687	156.634	1.10205	4.25054	5e-05	0.0145481	yes
LdBPK_262180.1.1	XLOC_000978	Non secretory protein	thimet oligopeptidase	iicb_chr26:844448-847352	q2	q3	OK	7.98416	25.1804	1.65709	4.3768	0.0001	0.0252167	yes
LdBPK_262400.1.1	XLOC_000983	Non secretory protein	conserved hypothetical protein; W D domain G-beta repeat	iicb_chr26:925972-942842	q1	q2	OK	19.715	8.16371	-1.272	-4.76052	5e-05	0.0145481	yes
LdBPK_270510.1.1;LdBPK_272520.1.1	XLOC_001023	Non secretory protein	calpain-like cysteine peptidase putative. Clan CA family C2	iicb_chr27:202182-204502	q2	q3	OK	3.2373	17.2647	2.41496	4.98197	5e-05	0.0145481	yes
LDON_270028700	XLOC_001086	Non secretory protein	rRNA	iicb_chr27:1027232-1029368	q1	q3	OK	1117.39	590.73	-0.919566	-3.83474	5e-05	0.0145481	yes
LdBPK_291840.1.1	XLOC_001220	Signal peptide	MutS-like protein	iicb_chr29:805912-810712	q1	q2	OK	57.4833	23.8647	-1.26826	-4.61238	5e-05	0.0145481	yes
no match	XLOC_001221	non coding	paraflagellar rod protein 1D (PFR1D), and histone H2A (H2A) genes	iicb_chr29:812463-814934	q1	q2	OK	723.638	374.33	-0.950956	-3.91745	0.00015	0.0354609	yes
LdBPK_310430.1.1	XLOC_001409	Non secretory protein	Calpain-like cysteine protease	iicb_chr31:132917-136502	q1	q2	OK	125.697	59.2182	-1.08584	-4.17859	5e-05	0.0145481	yes
LdBPK_310430.1.1	XLOC_001409	Non secretory protein	Calpain-like cysteine protease	iicb_chr31:132917-136502	q2	q3	OK	59.2182	160.538	1.4388	5.58549	5e-05	0.0145481	yes
LdBPK_322800.1.1	XLOC_001417	Non secretory protein	Amino acid transporter aATP11	iicb_chr31:215838-218422	q1	q2	OK	88.3269	247.801	1.48826	5.79748	5e-05	0.0145481	yes
LdBPK_311240.1.1	XLOC_001442	Non secretory protein	Pyrophosphate-energized vacuolar membrane proton pump	iicb_chr31:484818-489621	q2	q3	OK	183.197	344.498	0.911097	3.74771	0.0001	0.0252167	yes
LdBPK_311240.1.1	XLOC_001442	Non secretory protein	Pyrophosphate-energized vacuolar membrane proton pump	iicb_chr31:484818-489621	q1	q3	OK	180.162	344.498	0.935201	3.84728	5e-05	0.0145481	yes
LdBPK_312210.1.1;LdBPK_312220.1.1	XLOC_001493	Non secretory protein	prostaglandin f2-alpha synthase/D-arabinose dehydrogenase (LDBPK_312210) mRNA, complete cds; hypothetical protein	iicb_chr31:1059896-1069950	q2	q3	OK	54.56	103.557	0.924506	3.75492	0.0002	0.0432286	yes
LdBPK_312210.1.1;LdBPK_312220.1.1	XLOC_001493	Non secretory protein	prostaglandin f2-alpha synthase/D-arabinose dehydrogenase (LDBPK_312210) mRNA, complete cds; hypothetical protein	iicb_chr31:1059896-1069950	q1	q3	OK	52.6476	103.557	0.975983	3.96527	0.0002	0.0432286	yes
slight overlap; LdBPK_310360.1	XLOC_001532	Non secretory protein	Hypothetical protein	iicb_chr31:102760-103519	q1	q2	OK	32.3132	116.494	1.85005	4.70375	5e-05	0.0145481	yes
No match	XLOC_001663	Non secretory protein	3-hydroxyisobutyryl-coenzyme a hydrolase-like protein	iicb_chr32:1446833-1449981	q2	q3	OK	273.231	115.488	-1.24238	-4.98979	5e-05	0.0145481	yes
LdBPK_351210.1.1	XLOC_002002	Non secretory protein	pre-mRNA splicing factor ATP-dependent RNA helicase, putative	iicb_chr35:529378-532490	q1	q2	OK	10.6089	35.2905	1.73401	5.00761	5e-05	0.0145481	yes
LdBPK_355340.1.1	XLOC_002067	Signal peptide	conserved hypothetical protein	iicb_chr35:2066846-2081245	q2	q3	OK	186.491	87.9298	-1.08468	-4.58493	5e-05	0.0145481	yes
LdBPK_355340.1.1	XLOC_002067	Signal peptide	conserved hypothetical protein	iicb_chr35:2066846-2081245	q1	q2	OK	65.2425	186.491	1.51522	6.41579	5e-05	0.0145481	yes
LdBPK_362490.1.1	XLOC_002182	Non secretory protein	tyrosine amino transferase	iicb_chr36:946147-952228	q1	q3	OK	101.843	204.494	1.00571	4.08935	5e-05	0.0145481	yes
LdBPK_362700.1.1; LdBPK_362710.1.1;LdBPK_362720.1.1	XLOC_002249	Non secretory; strong signal peptide; signal peptide	membrane-bound acid phosphatase precursor; multifunctional cyclin-dependent kinase pho85-like protein; membrane-bound acid phosphatase	iicb_chr36:1041000-1054715	q2	q3	OK	84.0757	41.3317	-1.02444	-3.66427	0.0001	0.0252167	yes
LdBPK_050900.1.1	XLOC_002383	signal peptide	surface antigen-like protein	iicb_chr5:332478-334560	q1	q2	OK	338.195	171.032	-0.983594	-3.9264	5e-05	0.0145481	yes
LdBPK_061300.1.1; LdBPK_061310.1.1; LdBPK_061320.1.1; LdBPK_061330.1.1	XLOC_002440	Non secretory protein; non secretory protein but has a signal anchor; non secretory protein; non secretory protein	Transcription factor e(y)2, putative; conserved hypothetical protein; pteridine transporter C; coproporphyrinogen III oxidase; protoporphyrinogen oxidase-like protein	iicb_chr6:504836-516818	q2	q3	OK	164.797	73.3369	-1.16808	-4.54549	5e-05	0.0145481	yes
LdBPK_061300.1.1; LdBPK_061310.1.1; LdBPK_061320.1.1; LdBPK_061330.1.1	XLOC_002440	Non secretory protein; non secretory protein but has a signal anchor; non secretory protein; non secretory protein	Transcription factor e(y)2, putative; conserved hypothetical protein; pteridine transporter C; coproporphyrinogen III oxidase; protoporphyrinogen oxidase-like protein	iicb_chr6:504836-516818	q1	q2	OK	71.7886	164.797	1.19886	4.73465	5e-05	0.0145481	yes
LdBPK_081300.1.1	XLOC_002514	Non secretory protein	histone deacetylase	iicb_chr8:497978-502718	q1	q2	OK	727.133	357.565	-1.02401	-4.43413	5e-05	0.0145481	yes

## Sheet: Sheet1
gene_id		annotation	Location	sample_id	sample_id		FPKM	FPKM	log fold change	test_stat	p value	q value
XLOC_000069	XLOC_000069	-	iicb_chr10:437186-442425	q1	q2	OK	465.355	214.511	-1.11728	-4.68157	5e-05	0.0145481	yes
XLOC_000069	XLOC_000069	-	iicb_chr10:437186-442425	q1	q3	OK	465.355	235.576	-0.982138	-4.11407	0.00015	0.0354609	yes
XLOC_000069	XLOC_000069	-	iicb_chr10:437186-442425	q2	q3	OK	214.511	235.576	0.135141	0.550771	0.5725	0.999382	no
XLOC_000079	XLOC_000079	-	iicb_chr10:541679-543333	q1	q2	OK	66.4635	148.847	1.16319	4.11028	5e-05	0.0145481	yes
XLOC_000079	XLOC_000079	-	iicb_chr10:541679-543333	q1	q3	OK	66.4635	98.0197	0.56051	1.93519	0.0533	0.920581	no
XLOC_000079	XLOC_000079	-	iicb_chr10:541679-543333	q2	q3	OK	148.847	98.0197	-0.602682	-2.21433	0.0269	0.779599	no
XLOC_000281	XLOC_000281	-	iicb_chr15:803-12528	q1	q2	OK	108.43	54.1077	-1.00285	-3.89401	0.0001	0.0252167	yes
XLOC_000281	XLOC_000281	-	iicb_chr15:803-12528	q1	q3	OK	108.43	74.6189	-0.539144	-2.12331	0.03055	0.800393	no
XLOC_000281	XLOC_000281	-	iicb_chr15:803-12528	q2	q3	OK	54.1077	74.6189	0.463708	1.78737	0.06535	0.979705	no
XLOC_000309	XLOC_000309	-	iicb_chr15:317103-319298	q1	q2	OK	12.4276	1.3866	-3.16392	-5.25818	5e-05	0.0145481	yes
XLOC_000309	XLOC_000309	-	iicb_chr15:317103-319298	q1	q3	OK	12.4276	6.11904	-1.02217	-2.23556	0.0324	0.81702	no
XLOC_000309	XLOC_000309	-	iicb_chr15:317103-319298	q2	q3	OK	1.3866	6.11904	2.14175	3.38878	0.005	0.317857	no
XLOC_000544	XLOC_000544	-	iicb_chr19:382620-399010	q2	q3	OK	270.819	109.889	-1.30128	-4.18151	5e-05	0.0145481	yes
XLOC_000544	XLOC_000544	-	iicb_chr19:382620-399010	q1	q3	OK	179.356	109.889	-0.706777	-2.19692	0.0254	0.7565	no
XLOC_000544	XLOC_000544	-	iicb_chr19:382620-399010	q1	q2	OK	179.356	270.819	0.5945	1.96533	0.0474	0.903744	no
XLOC_000574	XLOC_000574	-	iicb_chr2:244438-249361	q2	q3	OK	51.238	106.08	1.04986	4.11042	5e-05	0.0145481	yes

## Sheet: Sheet2
XLOC_000309	q1	q2	-3.16392
XLOC_000743	q1	q2	-1.49048
XLOC_000544	q2	q3	-1.30128
XLOC_000983	q1	q2	-1.272
XLOC_001220	q1	q2	-1.26826
XLOC_001663	q2	q3	-1.24238
XLOC_002440	q2	q3	-1.16808
XLOC_000069	q1	q2	-1.11728
XLOC_001409	q1	q2	-1.08584
XLOC_002067	q2	q3	-1.08468
XLOC_002249	q2	q3	-1.02444
XLOC_002514	q1	q2	-1.02401
XLOC_000281	q1	q2	-1.00285
XLOC_002383	q1	q2	-0.983594
XLOC_000069	q1	q3	-0.982138
XLOC_001221	q1	q2	-0.950956
XLOC_001086	q1	q3	-0.919566
XLOC_001442	q2	q3	0.911097
XLOC_001493	q2	q3	0.924506
XLOC_000608	q2	q3	0.924864
XLOC_001442	q1	q3	0.935201
XLOC_001493	q1	q3	0.975983
XLOC_002182	q1	q3	1.00571
XLOC_000574	q2	q3	1.04986
XLOC_000952	q1	q2	1.10205
XLOC_000263	q2	q3	1.15076
XLOC_000079	q1	q2	1.16319
XLOC_002440	q1	q2	1.19886
XLOC_001409	q2	q3	1.4388
XLOC_001417	q1	q2	1.48826
XLOC_002067	q1	q2	1.51522
XLOC_000978	q2	q3	1.65709
XLOC_002002	q1	q2	1.73401
XLOC_001532	q1	q2	1.85005
XLOC_001023	q2	q3	2.41496
gene_id	sample_id	sample_id	log fold change
